# Supplementary material for: Ranking treatments in frequentist network meta-analysis works without resampling methods
Source: Springer Nature journal article supplement (doi:10.1186/s12874-015-0060-8), 2015-07-30
Supplement: MOESM1 [file 9737310]

Additional file to:  
Ranking treatments in frequentist network meta-analysis works without re-sampling methods

Gerta Rücker and Guido Schwarzer

## Probability of being best and AUC

We have

$$P(\mu_A > \mu_B) = \int_{-\infty}^{\infty} P(\mu_A > y) dP_{\mu_B} = \int_{-\infty}^{\infty} (1 - F_A(y)) dP_{\mu_B}.$$

Writing  $f_B$  for the density of  $\mu_B$ , we obtain

$$P(\mu_A > \mu_B) = \int_{-\infty}^{\infty} (1 - F_A(y)) f_B(y) dy.$$

Substituting  $y$  by  $t$  with  $t = 1 - F_B(y)$ , we obtain  $y = F_B^{-1}(1 - t)$  and  $dt = -f_B(y) dy$  and thus

$$P(\mu_A > \mu_B) = \int_0^1 1 - F_A(F_B^{-1}(1 - t)) dt.$$

Interpreting

$$R(t) = 1 - F_A(F_B^{-1}(1 - t))$$

as a receiver operating characteristic (ROC) function characterizing the distance of the distributions  $F_A$  and  $F_B$ , we see that

$$P(\mu_A > \mu_B) = \int_0^1 R(t) dt$$

corresponds to the area under the ROC curve (AUC).
