# Supplementary material for: Ranking treatments in frequentist network meta-analysis works without resampling methods
Source: Springer Nature journal article supplement (doi:10.1186/s12874-015-0060-8), 2015-07-30
Supplement: MOESM2 [file 9737310]

Additional file to:  
 Ranking treatments in frequentist network meta-analysis works without re-sampling methods

Gerta Rücker and Guido Schwarzer

## Proof that SUCRA and P-score are identical

We consider all probabilities as known. Let  $R(i) = k$  mean s that treatment  $i$  has rank  $k$ . We have

$$P_{ij} = \sum_{k=1}^{n-1} \sum_{l=k+1}^n P(R(i) = k \wedge R(j) = l)$$

and

$$(n-1)SUCRA(i) = \sum_{r=1}^{n-1} F(i, r) = \sum_{r=1}^{n-1} \sum_{k=1}^r P(i, k) = \sum_{k=1}^{n-1} \sum_{r=k}^{n-1} P(i, k) = \sum_{k=1}^{n-1} (n-k)P(i, k)$$

which is the expected proportion of treatments worse than  $i$ . It follows

$$\begin{aligned} \sum_{j=1}^n P_{ij} &= \sum_{j=1}^n \sum_{k=1}^{n-1} \sum_{l=k+1}^n P(R(i) = k \wedge R(j) = l) \\ &= \sum_{k=1}^{n-1} \sum_{l=k+1}^n P(i, k) = \sum_{k=1}^{n-1} (n-k)P(i, k) \\ &= (n-1)SUCRA(i) \end{aligned}$$

and thus

$$\bar{P}_i = \frac{1}{n-1} \sum_{j=1}^n P_{ij} = SUCRA(i)$$

which is what we wanted to prove.

Note: For  $n > 2$ , neither the ranking probabilities  $P(i, k)$ , nor the probabilities  $P_{ij}$  can be uniquely derived from  $\bar{P}_i$  or  $SUCRA(i)$ .
